# Supplementary material
Source: Elsevier journal article supplement (https://www.sciencedirect.com/science/article/pii/S2254887417300322)
Supplement: mmc1 [file S2254887417300322:mmc1.pdf]

Material suplementario). Justificación de las recomendaciones que se desaconsejan a los pacientes con fibrilación auricular en tratamiento anticoagulante

| Comportamiento incluidos en las recomendaciones “no hacer”                                                                                                                                                                  | Justificación                                                                                                                                                                                                                        |
|-----------------------------------------------------------------------------------------------------------------------------------------------------------------------------------------------------------------------------|--------------------------------------------------------------------------------------------------------------------------------------------------------------------------------------------------------------------------------------|
| No hay que automedicarse con fármacos, medicina natural, AINES, AAS, etc.                                                                                                                                                   | Evitar interacciones medicamentosas. Los productos de herbolario son ricos en vitamina K y pueden reducir el efecto anticoagulante de los AVK.                                                                                       |
| No hay que compensar una dosis olvidada por una dosis doble.<br>No hay que modificar la dosis prescrita                                                                                                                     | Cuando se interpretan los resultados de los estudios de coagulación en situaciones especiales es imprescindible conocer con exactitud cuándo se realiza la extracción de sangre en relación a la última dosis administrada del ACOD. |
| No hay que dar por supuesto que el profesional sanitario conoce la situación personal o clínica del paciente (p. ej., maternidad; comienzo de una dieta de adelgazamiento sin consejo médico, viajes, cambios estacionales) | Evitar sobredosificación y eventos adversos relacionados.                                                                                                                                                                            |
| No hay que tomar TAO en horario irregular                                                                                                                                                                                   | Preservar las propiedades del medicamento y prevenir errores de dosificación. Imprescindible para dabigatrán etexilato por su formulación galénica.                                                                                  |
| No hay que dejar sin supervisión la toma de medicación en el hogar en el caso de pacientes ancianos o con dificultades cognitivas                                                                                           | Prevenir accidentes hemorrágicos en localizaciones de difícil acceso                                                                                                                                                                 |
| No hay que manipular los medicamentos                                                                                                                                                                                       | Prevención de complicaciones por contraindicación del TAO y prevención de incompatibilidad medicamentosa derivada de la manipulación del medicamento; prevenir infra o sobredosificación del TAO.                                    |
| No hay que aplazar los controles y suministro de medicación anticoagulante en el caso de salir de viaje                                                                                                                     | Prevenir el manejo inadecuado del régimen terapéutico. Evitar eventos adversos.                                                                                                                                                      |
| No hay que seguir los consejos de otros pacientes anticoagulados ya que pueden tener otro perfil y otras necesidades terapéuticas                                                                                           | Prevenir las consecuencias de la falta de programación en los desplazamientos                                                                                                                                                        |

|                                                                                                                                                                                                                                                      |                                                                                                                                                                              |
|------------------------------------------------------------------------------------------------------------------------------------------------------------------------------------------------------------------------------------------------------|------------------------------------------------------------------------------------------------------------------------------------------------------------------------------|
| No hay que dejarse en casa la lista de todos los medicamentos que se está tomando cuando va a ir a consulta médica                                                                                                                                   | Prevenir el manejo inadecuado del régimen terapéutico. Evitar eventos adversos.                                                                                              |
| No hay que acudir a consulta sin acompañamiento, cuando se padecen déficits cognitivos                                                                                                                                                               | Evitar interacciones medicamentosas y poder informar siempre de la medicación que actualmente está tomando, para lo que se aconseja llevar siempre la lista de medicamentos. |
| No hay que dejar de tomar la medicación por respetar el ayuno en el caso de acudir a un centro sanitario para realizar una analítica                                                                                                                 | Se pueden tomar anticoagulantes en ayunas, a excepción del rivaroxaban que se aconseja tomarlo con alimentos.                                                                |
| No hay que realizar deportes de alto riesgo                                                                                                                                                                                                          | Una pauta de anticoagulación inadecuada puede ocasionar complicaciones durante y después de la intervención.                                                                 |
| No hay que cambiar la pauta de anticoagulación para realizar procedimientos intervencionistas cuyo seguimiento no podemos realizar (p. ej., cirugía mayor o procedimientos diagnósticos invasivos que se van a realizar en otros centros sanitarios) | Prevenir errores en régimen terapéutico y eventos adversos trombóticos o hemorrágicos derivados de las dificultades cognitivas del paciente.                                 |

AAS: Ácido acetilsalicílico. ACOD: Anticoagulantes orales directos. AINES: Antiinflamatorios no esteroideos. AVK: Antagonistas de la vitamina K. TAO: Tratamiento anticoagulante oral.
